# Supplementary figures and images for: Adaptive filtering enhances information transmission in visual cortex
Source: Springer Nature journal article supplement (doi:10.1038/nature04519), 2006-02-01

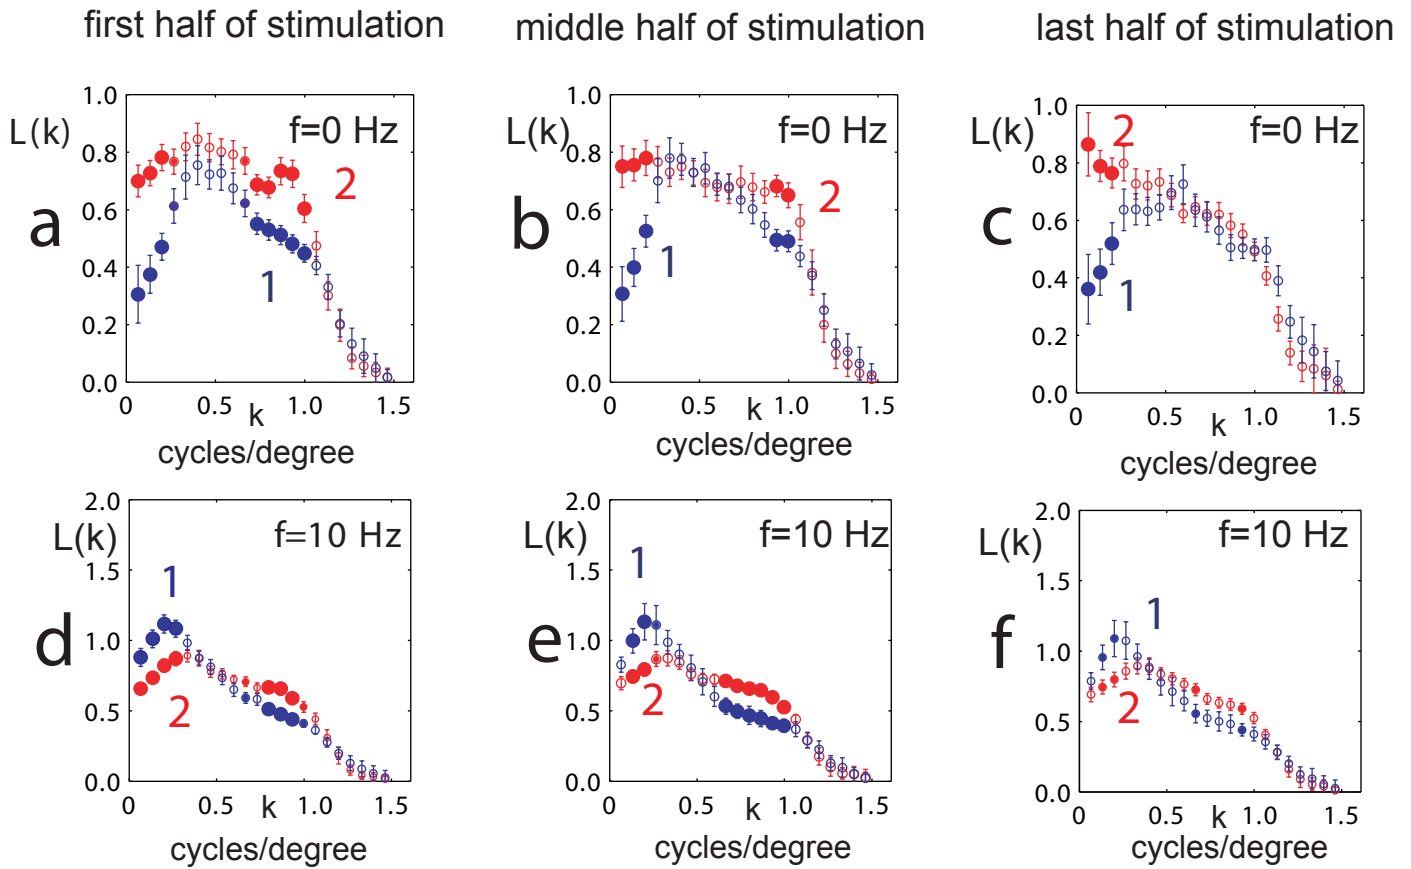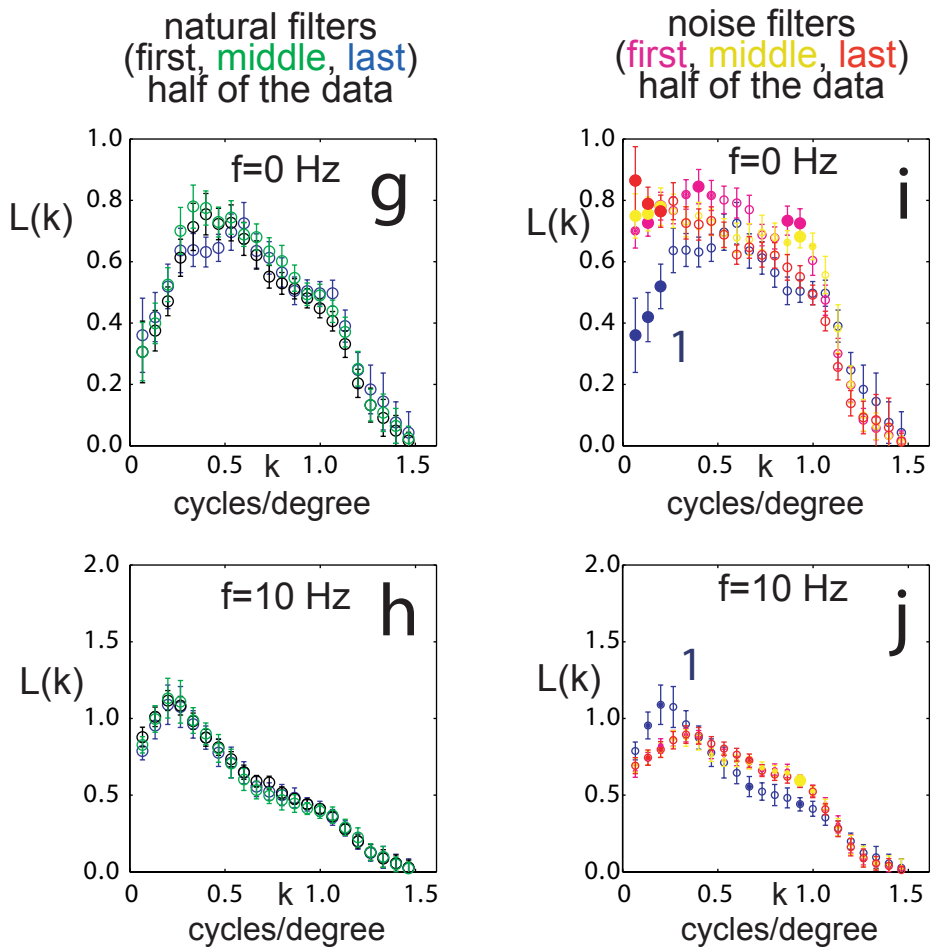

supplementary figure 5

Supplement: nature04519-s11.pdf [file nature04519-s11.pdf]
